# Supplementary material for: TAOK3 limits age-associated inflammation by negatively modulating macrophage differentiation and their production of TNFα
Source: Springer Nature journal article supplement (doi:10.1186/s12979-023-00350-y), 2023-07-03
Supplement: MOESM2 [file 25568394]

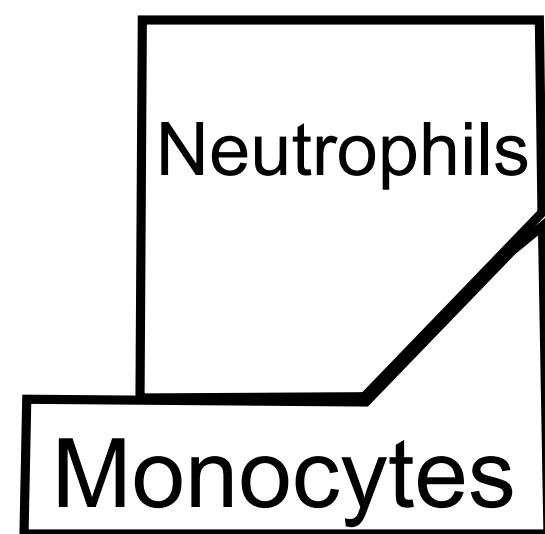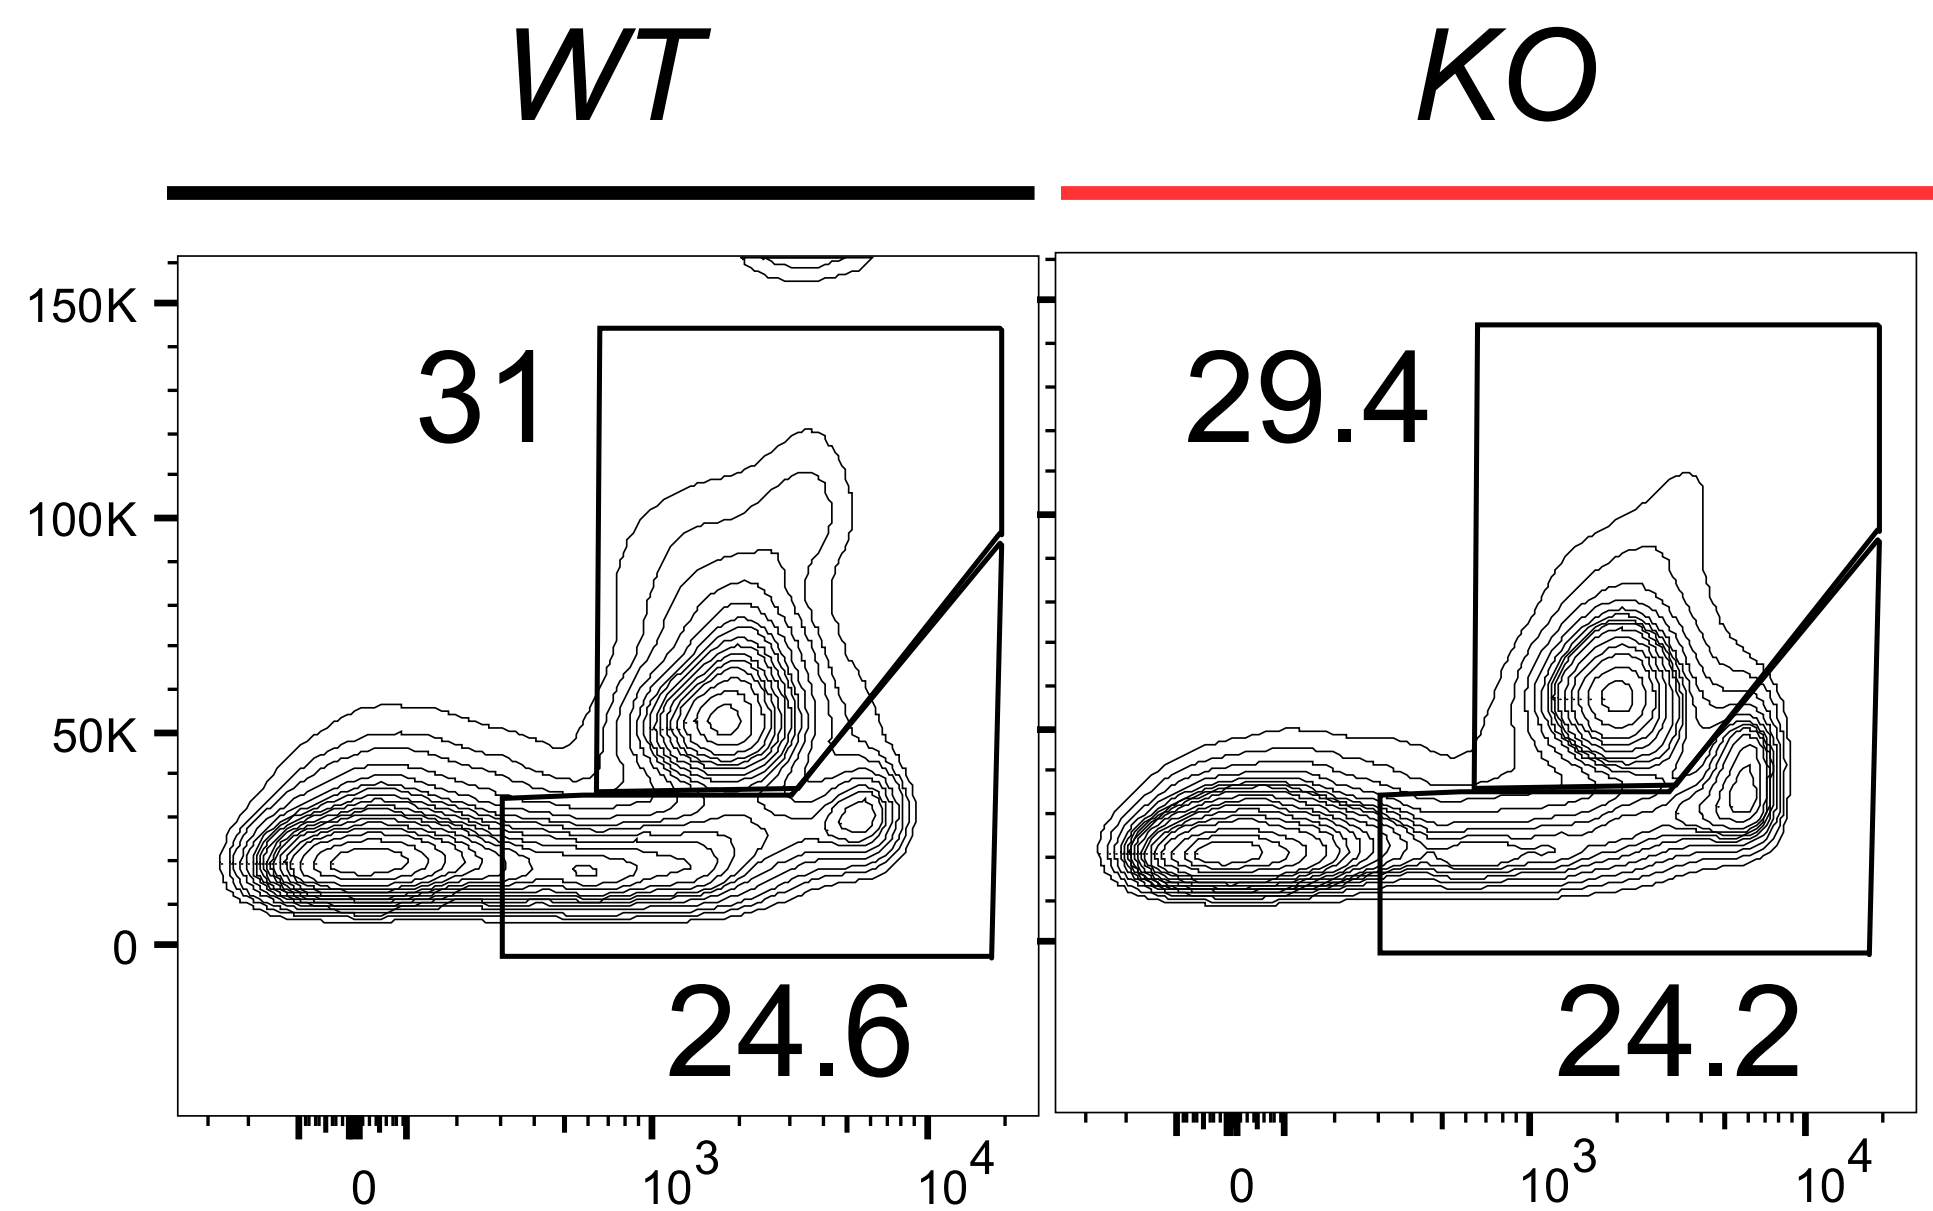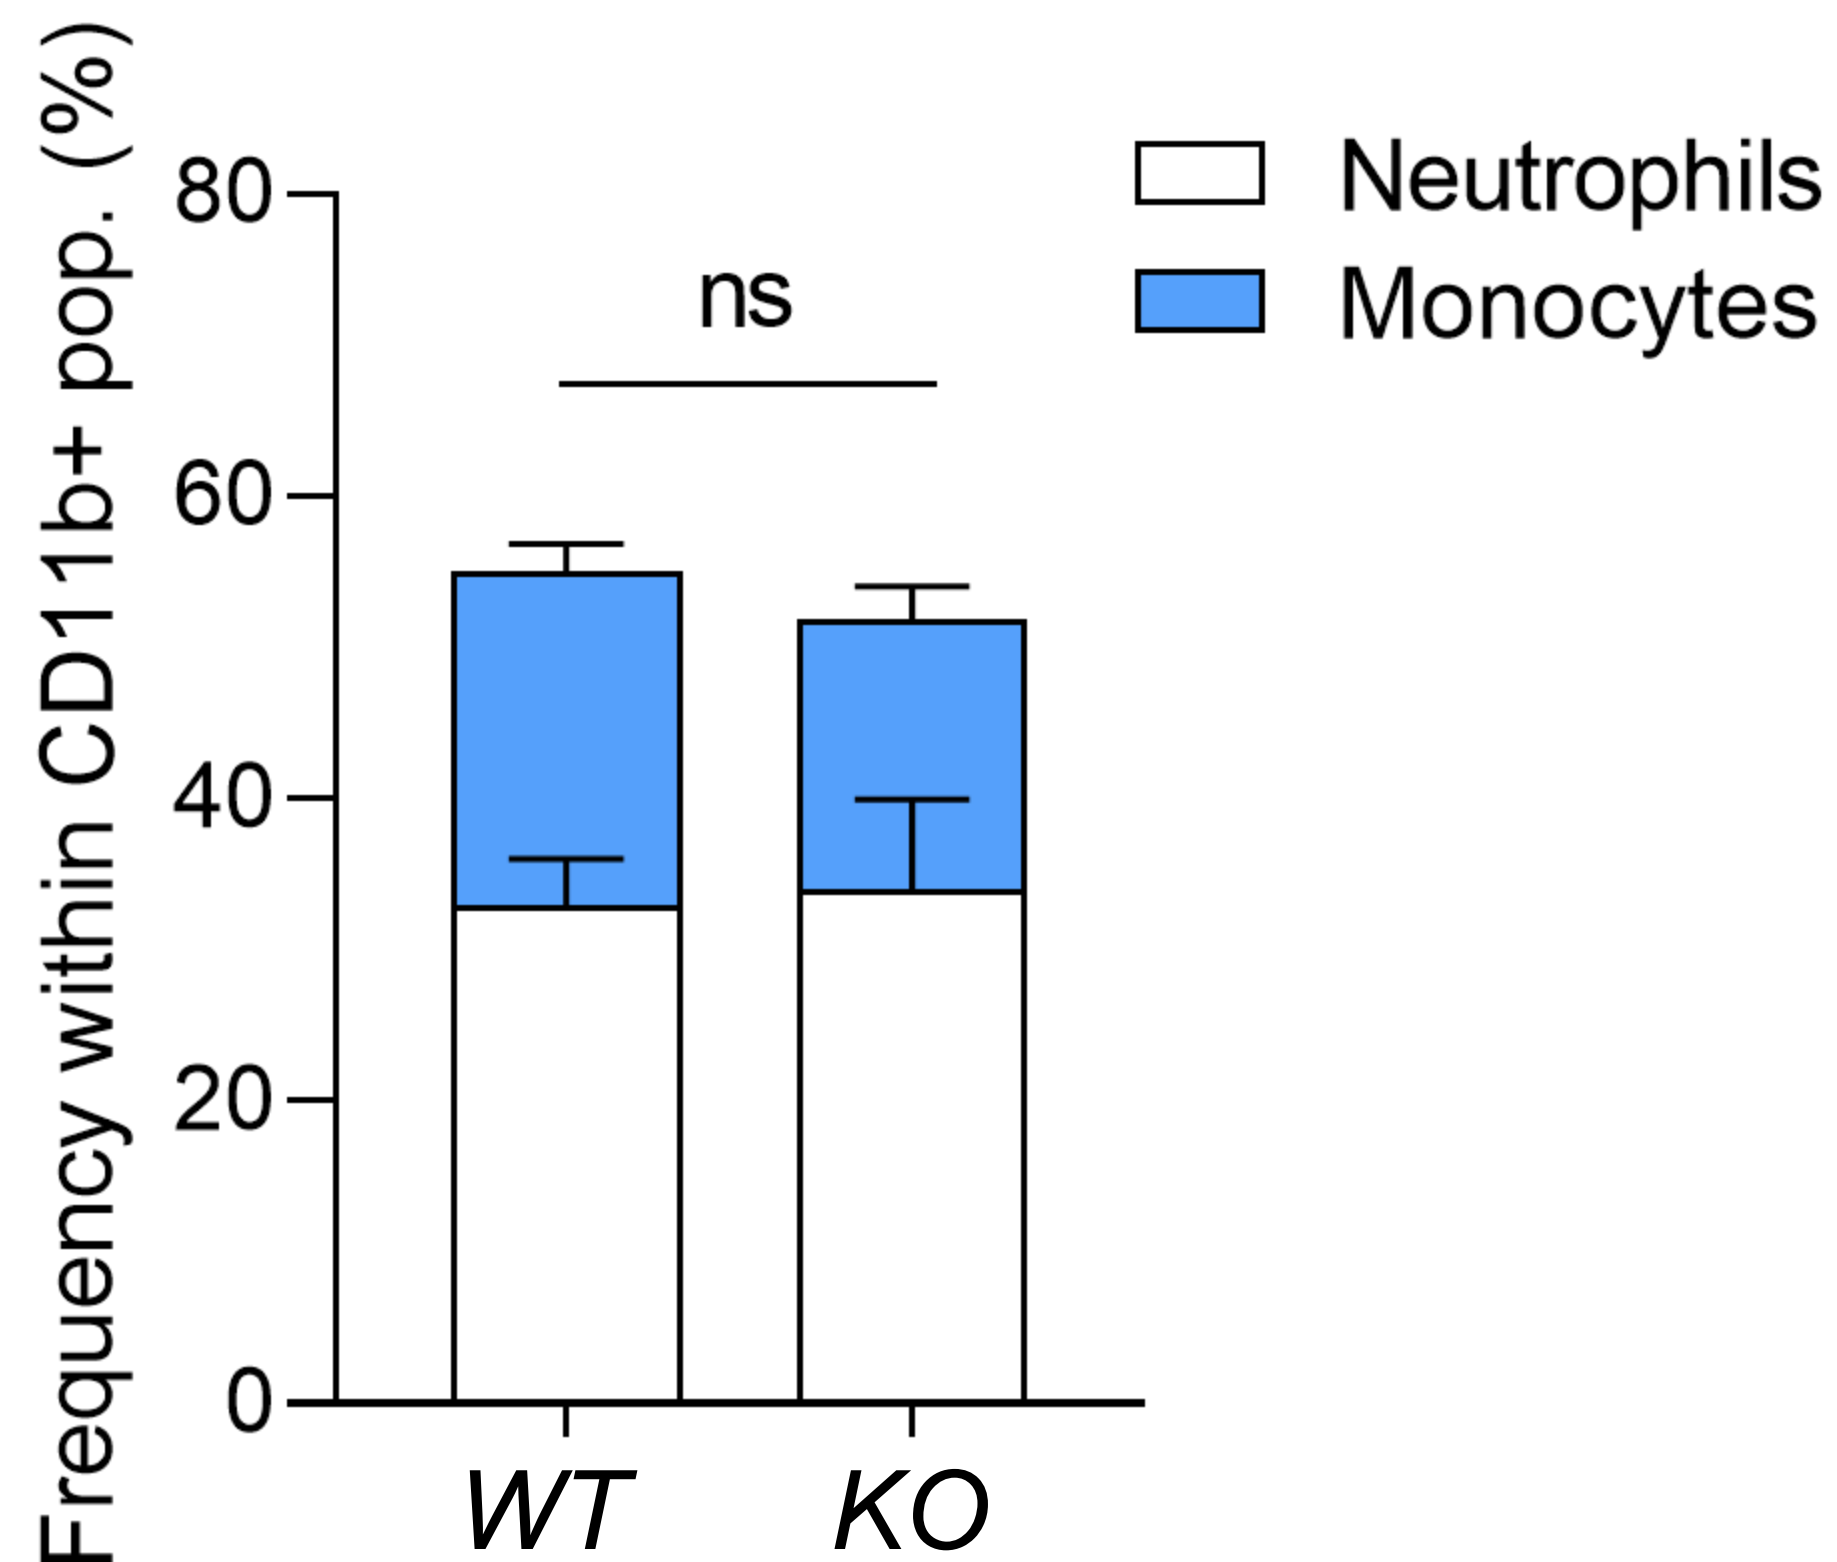

Peripheral blood
